# Supplementary material for: Wfs1 and Related Molecules as Key Candidate Genes in the Hippocampus of Depression
Source: PubMed Central journal article supplement (PMC7863986; doi:10.3389/fgene.2020.589370), 2021-01-22
Supplement: Image_1.pdf [file Image_1.pdf]

A

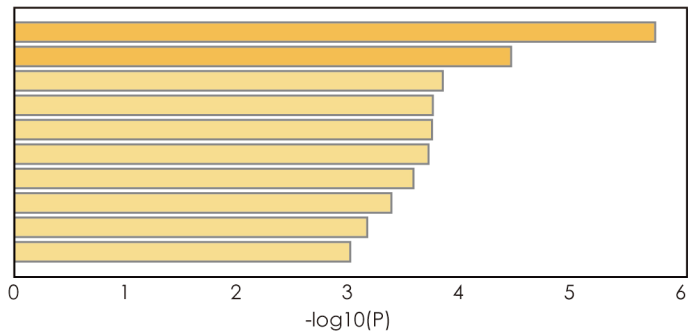

GO:0007622: rhythmic behavior  
 GO:0032691: negative regulation of interleukin-1 beta production  
 GO:0090050: positive regulation of cell migration involved in sprouting angiogenesis  
 R-MMU-202430: Translocation of ZAP-70 to Immunological synapse  
 R-MMU-381426: Regulation of Insulin-like Growth Factor (IGF) transport  
 GO:0001501: skeletal system development  
 GO:0061053: somite development  
 GO:0007204: positive regulation of cytosolic calcium ion concentration  
 GO:0048592: eye morphogenesis  
 GO:0051146: striated muscle cell differentiation

B

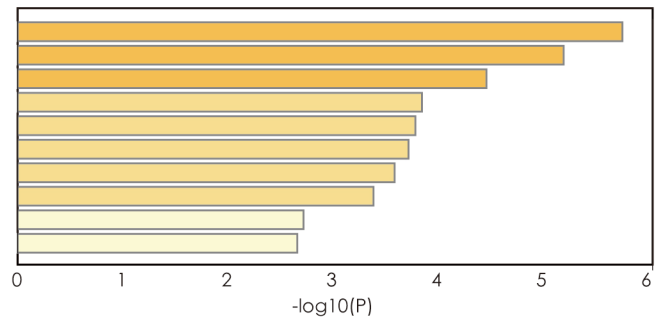

GO:0048511: rhythmic process  
 GO:0007610: behavior  
 GO:0071840: regulation of cell apoptotic  
 GO:0040011: locomotion  
 GO:0032501: multicellular organismal process  
 GO:0032502: developmental process  
 GO:0048518: positive regulation of biological process  
 GO:0065007: biological regulation  
 GO:0051179: localization  
 GO:0023052: signaling
