# Supplementary material for: Wfs1 and Related Molecules as Key Candidate Genes in the Hippocampus of Depression
Source: PubMed Central journal article supplement (PMC7863986; doi:10.3389/fgene.2020.589370), 2021-01-22

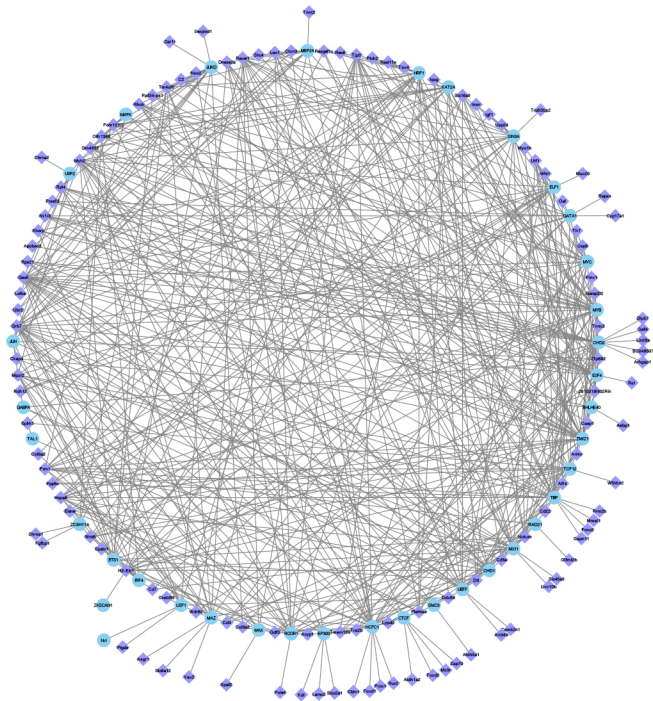

Supplement: Image_2.pdf [file Image_2.pdf]
